# Supplementary material for: Titanium Dioxide Nanoparticles Exacerbate Allergic Airway Inflammation via TXNIP Upregulation in a Mouse Model of Asthma
Source: MDPI journal article supplement (doi:10.3390/ijms22189924), 2021-09-14
Supplement: s1 [file s1]

# **Titanium dioxide nanoparticles exacerbate allergic airway inflammation via TXNIP upregulation in a mouse model of asthma**

Je-Oh Lim<sup>1</sup>, Se-Jin Lee<sup>1</sup>, Woong-Il Kim<sup>1</sup>, So-Won Pak<sup>1</sup>, Changjong Moon<sup>1</sup>, In-Sik Shin<sup>1</sup>, Jeong-Doo Heo<sup>2\*</sup>, Jong-Choon Kim<sup>1\*</sup>

<sup>1</sup> College of Veterinary Medicine and BK21 FOUR Program, Chonnam National University, 77 Yongbong-ro, Buk-gu, Gwangju 61186, Republic of Korea

<sup>2</sup> Bioenvironmental Science & Technology Division, Korea Institute of Toxicology, Jinju 52834, Republic of Korea

\*Correspondence: [jdher@kitox.re.kr](mailto:jdher@kitox.re.kr); [toxkim@jnu.ac.kr](mailto:toxkim@jnu.ac.kr)

<sup>2</sup> Bioenvironmental Science & Technology Division, Korea Institute of Toxicology, Jinju 52834, Republic of Korea

<sup>1</sup> College of Veterinary Medicine and BK21 FOUR Program, Chonnam National University, 77 Yongbong-ro, Buk-gu, Gwangju 61186, Republic of Korea

Additional file 1: Figures S1–S4 and Table S1

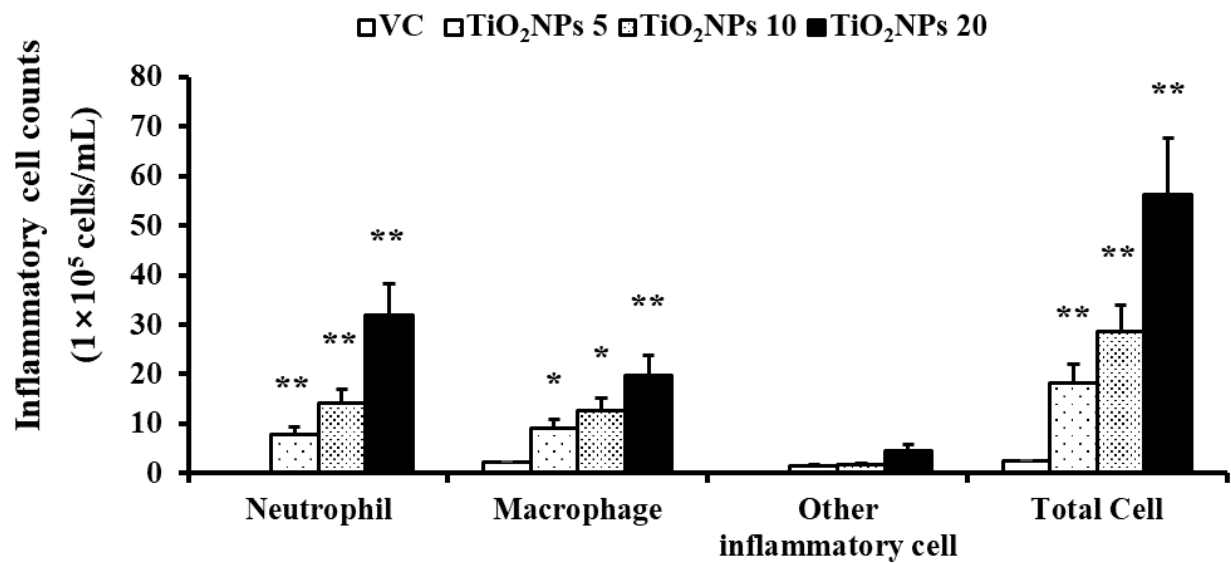

**Figure S1** Effects of TiO<sub>2</sub>NPs exposure on inflammatory cell counts in BALF. Mice were exposed three times at two-day intervals to a concentration of 5, 10, or 20 mg/kg TiO<sub>2</sub>NPs, and BALF samples were collected at 48 h after the last exposure. Exposure to TiO<sub>2</sub>NPs significantly increased inflammatory cell counts in the BALF compared with those in the VC group. VC, PBS intranasal instillation; TiO<sub>2</sub>NPs 5, 10, and 20, TiO<sub>2</sub>NPs intranasal instillation (5, 10, and 20 mg/kg, respectively). Data are represented as means ± SD, n = 6. \* p < 0.05, \*\* p < 0.01, significantly different from the VC group.

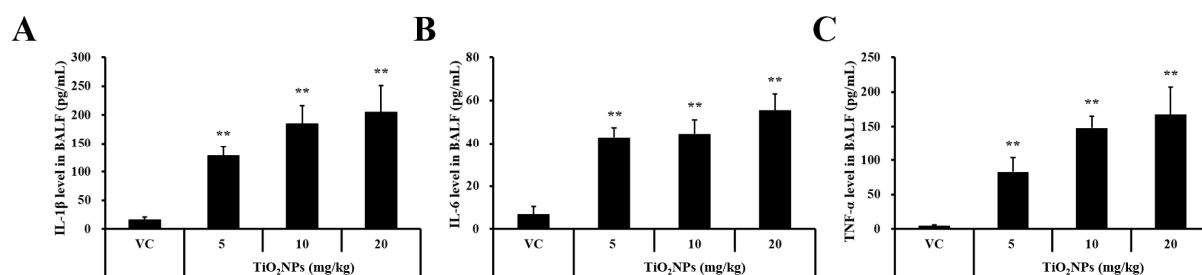

**Figure S2** Effects of TiO<sub>2</sub>NPs exposure on cytokine levels in BALF. **a** IL-1 $\beta$  level in BALF. **b** IL-6 level in BALF. **c** TNF- $\alpha$  level in BALF. The levels of the cytokines were measured in BALF using commercial enzyme-linked immunosorbent assay kits (BD Biosciences, San Jose, CA, USA) according to the manufacturer's protocol. The levels of IL-1 $\beta$ , IL-6, and TNF- $\alpha$  were significantly increased in TiO<sub>2</sub>NPs-treated groups compared with those in the VC group. VC, PBS intranasal instillation; TiO<sub>2</sub>NPs 5, 10, and 20, TiO<sub>2</sub>NPs intranasal instillation (5, 10, and 20 mg/kg, respectively). Data are represented as means  $\pm$  SD, n = 6. \*\*  $p$  < 0.01, significantly different from the VC group.

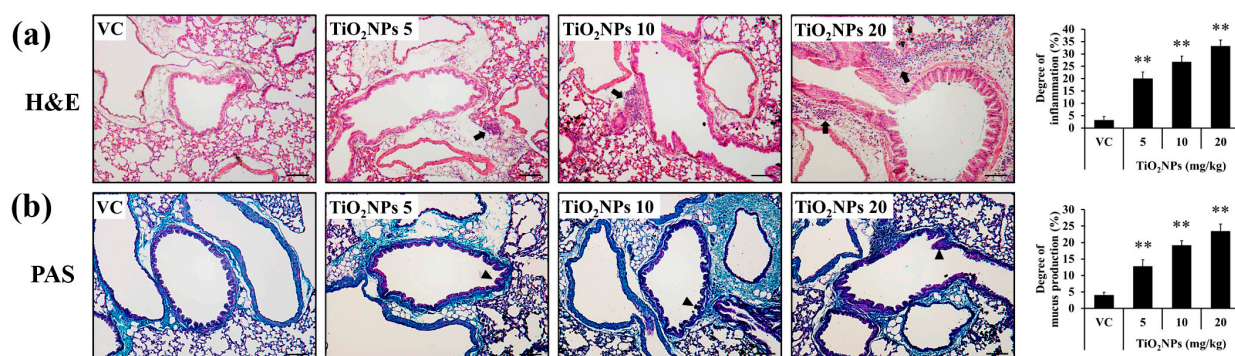

**Figure S3** Effects of TiO<sub>2</sub>NPs exposure on inflammatory cell infiltration and mucus production in the lungs. **a** Representative hematoxylin and eosin-stained sections of lung and histological scoring of inflammatory cell infiltration ( $\times 200$ ). **b** Representative periodic acid Schiff-stained sections of bronchi and histological scoring of mucus production ( $\times 200$ ). VC, PBS intranasal instillation; TiO<sub>2</sub>NPs 5, 10, and 20, TiO<sub>2</sub>NPs intranasal instillation (5, 10, and 20 mg/kg, respectively). Black arrows indicate inflammatory cell infiltration. Black arrowheads indicate mucus within lung epithelial goblet cells. Data are represented as means  $\pm$  SD,  $n = 6$ . \*\*  $p < 0.01$ , significantly different from the VC group. Bar = 50  $\mu\text{m}$ .

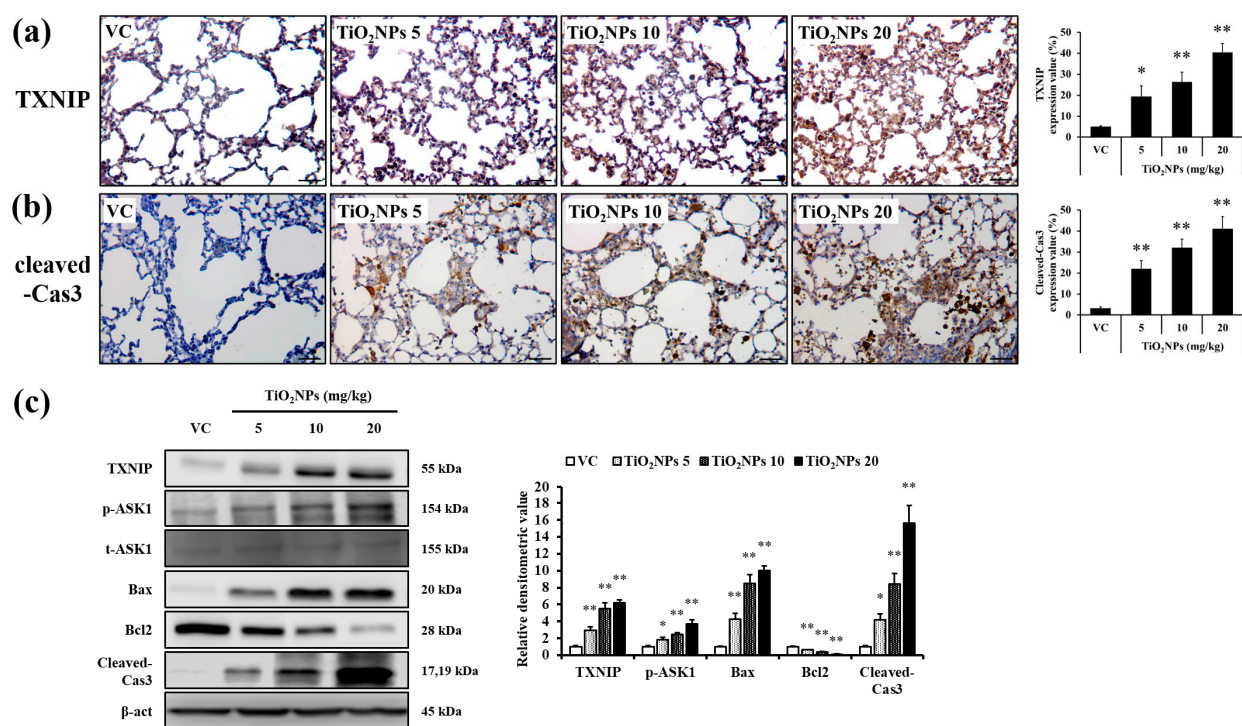

**Figure S4** Effects of TiO<sub>2</sub>NPs exposure on the expression of TXNIP, p-ASK1, t-ASK1, Bax, Bcl2, and cleaved-Cas3 in the lungs. **a** Expression of TXNIP ( $\times 400$ , alveolar). **b** Expression of cleaved-Cas3 ( $\times 400$ , alveolar). **c** Protein expression was determined using western blotting. **d** Relative densitometric values of protein expression. VC, PBS intranasal instillation; TiO<sub>2</sub>NPs 5, 10, and 20, TiO<sub>2</sub>NPs intranasal instillation (5, 10, and 20 mg/kg, respectively). Data are represented as means  $\pm$  SD,  $n = 6$ . \*  $p < 0.05$ , \*\*  $p < 0.01$ , significantly different from the VC group. Bar = 50  $\mu\text{m}$ .

**Table S1.** Primer sequences for qRT-PCR

| Target genes |         | Sequence (5' → 3')         | T <sub>m</sub> °C | T <sub>A</sub> °C |
|--------------|---------|----------------------------|-------------------|-------------------|
| <i>TNF-α</i> | Forward | CAA AGT AGA CCT GCC CAG AC | 59.3              | 55                |
|              | Reverse | GAC CTC TCT CTA ATC AGC CC | 59.3              |                   |
| <i>IL-6</i>  | Forward | ATG CAA TAA CCA CCC CTG AC | 57.3              | 55                |
|              | Reverse | ATC TGA GGT GCC CAT GCT AC | 59.3              |                   |
| <i>IL-1β</i> | Forward | AGC CAG GAC AGT CAG CTC TC | 61.4              | 55                |
|              | Reverse | ACT TCT TGC CCC CTT TGA AT | 55.2              |                   |
| <i>GAPDH</i> | Forward | CAA AAG GGT CAT CAT CTC TG | 55.2              | 55                |
|              | Reverse | CCT GCT TCA CCA CCT TCT TG | 59.3              |                   |

TNF- $\alpha$ , tumor necrosis factor-alpha; IL-6, interleukin-6; IL-1 $\beta$ , interleukin-1 $\beta$ ; GAPDH, glyceraldehydes-3-phosphate dehydrogenase; T<sub>m</sub>, melting temperature of primer; and T<sub>A</sub>, annealing temperature in PCR.
